# Supplementary material for: Resveratrol inhibits age-dependent spontaneous tumorigenesis by SIRT1-mediated post-translational modulations in the annual fish Nothobranchius guentheri
Source: PubMed Central journal article supplement (PMC5589669; doi:10.18632/oncotarget.19268), 2017-07-15
Supplement: oncotarget-08-55422-s001.pdf [file oncotarget-08-55422-s001.pdf]

## Resveratrol inhibits age-dependent spontaneous tumorigenesis by SIRT1-mediated post-translational modulations in the annual fish *Nothobranchius guentheri*

### SUPPLEMENTARY MATERIALS

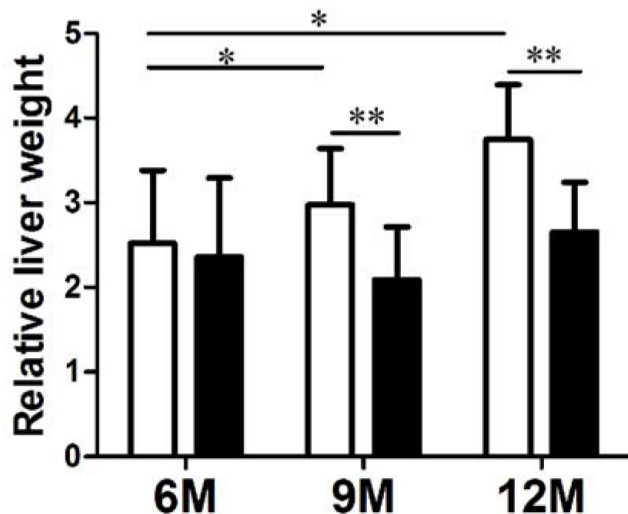

**Supplementary Figure 1:** The relative live weight of the annual fish at 6-, 9- and 12-month-old. Resveratrol decreased relative live weight significantly at last two stages.

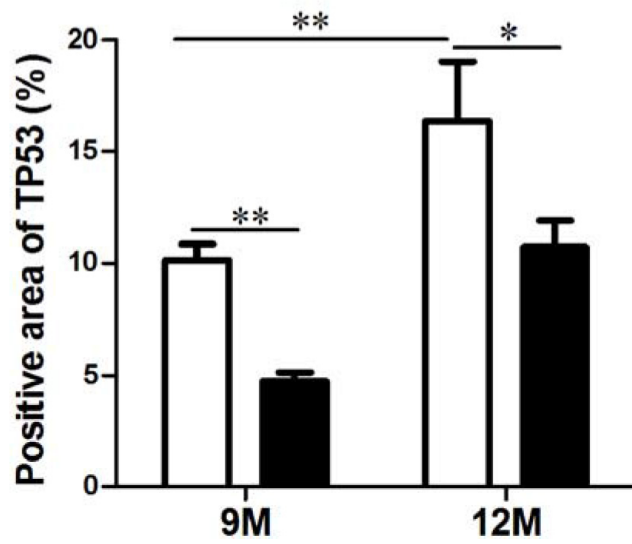

**Supplementary Figure 2: The level of TP53 immunoreactivity at 9- and 12-month-old.** Resveratrol reduced positive staining of TP53 at the two stages.

**Supplementary Table 1: Description of number of fish used for each experimental approach**

| Assay                                         | 6M CONT | 6M RES | 9M CONT | 9M RES | 12M CONT | 12M RES |
|-----------------------------------------------|---------|--------|---------|--------|----------|---------|
| Relative liver weights and Histological study | 10      | 10     | 10      | 10     | 10       | 10      |
| AST, ALT                                      | 6       | 6      | 6       | 6      | 6        | 6       |
| SIRT1                                         | 3       | 3      | 6       | 6      | 6        | 6       |
| PCNA, TP53                                    |         |        | 6       | 6      | 6        | 6       |
| K-Ras                                         |         |        | 6       | 6      | 6        | 6       |
| PI3K, p-Akt                                   |         |        | 6       | 6      | 6        | 6       |
| FoxO1, Bcl-2                                  |         |        | 3       | 3      | 3        | 3       |
| FoxO3a, Bax                                   |         |        | 3       | 3      | 6        | 6       |
| Ac-FoxO1, cleaved caspase-3                   |         |        |         |        | 6        | 6       |
| p-FoxO3a cleaved caspase-7                    |         |        |         |        | 6        | 6       |
| DLC1 cleaved caspase-9                        |         |        | 3       | 3      | 6        | 6       |
| Tunel                                         | 5       | 5      | 5       | 5      | 5        | 5       |
| IP: SIRT1 and K-Ras                           | 5       | 5      |         |        |          |         |
| IP: ac-KRas                                   |         |        |         |        | 5        | 5       |
| IP: SIRT1 and DLC1                            |         |        | 10      | 10     |          |         |
| IP: PAS                                       |         |        | 5       | 5      |          |         |

Supplementary Table 2: Antibodies used in this study along with dilutions

| Antibody          | Catalog                  | Molecular wt | Assay  | Dilution                                    |
|-------------------|--------------------------|--------------|--------|---------------------------------------------|
| SIRT1             | CST (8469)               | 120 KD       | WB/IMC | 1:1000/1:200                                |
| TP53              | Santa(sc-99)             |              | IMC    | 1:200                                       |
| PCNA              | Santa (sc-7907)          | 36 KD        | WB/IMC | 1:1000/1:200                                |
| K-Ras             | Santa (sc-30)            | 21 KD        | WB/IMC | 1:1000/1:200                                |
| PI3K              | CST (4249)               |              | IMC    | 1:200                                       |
| p-AKT             | CST (4060)               |              | IMC    | 1:200                                       |
| FoxO1             | Bioworld (BS1746)        | 70-82 KD     | WB/IMC | 1:1000/1:200                                |
| FoxO3a            | CST (12829)              | 82-97        | WB/IMC | 1:1000/1:200                                |
| Ac-FoxO1          | Santa (sc-49437)         | 70           | WB     | 1:1000                                      |
| p-FoxO3a          | CST (9465)               | 97           | WB     | 1:1000                                      |
| DLC1              | BD (612021)              | 123          | WB/IP  | 1:1000/<br>0.5-1mg protein: 2ug<br>antibody |
| SIRT1             | Santa (sc-74465)         | 120          | IP     | 0.5-1mg protein: 2ug<br>antibody            |
| Ac-Lys            | CST (9441)               |              | IB     | 1:1000                                      |
| Bcl-2             | Proteintech (12789-1-AP) | 26           | WB     | 1:1000                                      |
| Bax               | CST (2772)               | 20           | WB     | 1:1000                                      |
| Cleaved caspase-3 | CST (9664)               | 17, 19       | WB     | 1:1000                                      |
| Cleaved caspase-7 | CST (8438)               | 18           | WB     | 1:1000                                      |
| Cleaved caspase-9 | CST (7237)               | 37           | WB     | 1:1000                                      |
| Actin             | Proteintech (66009-1-Ig) | 42           | WB     | 1:2000                                      |
| GAPDH             | Affinity (T0004)         | 34           | WB     | 1:2000                                      |
| PAS               | CST(9611S)               |              | IB     | 1:1000                                      |

CST: Cell Signaling Technology.

Santa: Santa Cruz Biotechnology.

BD: BD Biosciences.
